# Supplementary material for: Pediatric acute lymphoblastic leukemia
Source: PubMed Central journal article supplement — Haematologica. 2020 Sep 10;105(11):2524–39. doi: 10.3324/haematol.2020.247031 (PMC7604619; doi:10.3324/haematol.2020.247031), 2020-09-10
Supplement: 2020_247031-Disclosures_Contributions.pdf [file 2020_247031-Disclosures_Contributions.pdf]

Haematologica  
HAEMATOL/2020/247031  
Version 3  
Centenary Review Article - Pediatric Acute Lymphoblastic Leukemia

Hiroto Inaba and Charles G Mullighan

Disclosures: Charles Mullighan has received research funding from Loxo Oncology, Pfizer, and Abbvie; and has served on the advisory board and received consulting fees for Illumina, and speaking fees from, and holds stock in Amgen. Patents: Molecules and Methods Related to Treatment of Cellular Proliferation US Provisional Application No. 62/881,774 Method and kit for analyzing responsiveness of patients to CD19 immunotherapy 2019 (filed)

Contributions: CGM and HI researched the literature and wrote the manuscript.
